# Supplementary material for: Gene Expression Analysis of Induced Plum pox virus (Sharka) Resistance in Peach (Prunus persica) by Almond (P. dulcis) Grafting
Source: MDPI journal article supplement (doi:10.3390/ijms22073585), 2021-03-30
Supplement: s1 [file s1]

Assay Class: Eukaryote Total RNA Nano  
Data Path: \\1...Eukaryote Total RNA Nano\_DE23101893\_2015-05-06\_09-36-22.xad

Created: 5/6/2015 9:36:22 AM  
Modified: 5/6/2015 3:58:01 PM

**Electrophoresis File Run Summary**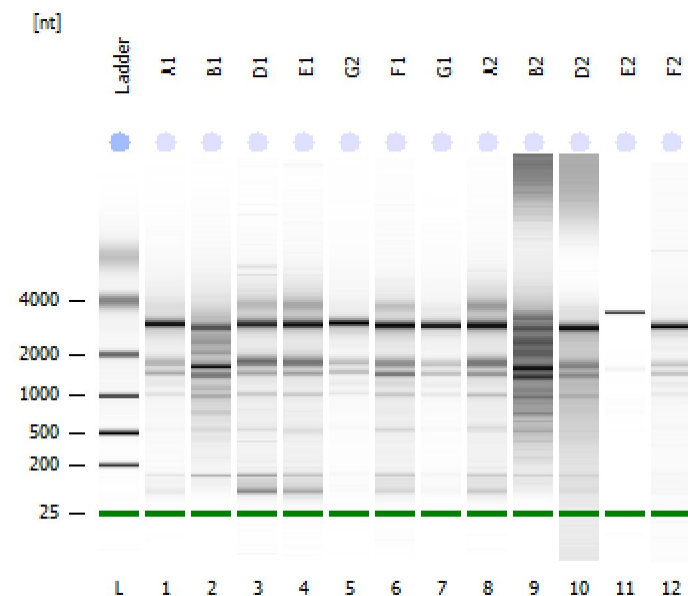Instrument Information:

Instrument Name: DE23101893  
Serial#: DE23101893

Firmware: C.01.069  
Type: G2938B

Assay Information:

Assay Origin Path: C:\Program Files\Agilent\2100 bioanalyzer\2100 expert\assays\RNA\Eukaryote Total RNA Nano Series II.xsy

Assay Class: Eukaryote Total RNA Nano

Version: 2.6

Assay Comments: Total RNA Analysis ng sensitivity (Eukaryote)

© Copyright 2003 - 2009 Agilent Technologies, Inc.

Chip Information:

Chip Lot #:

Reagent Kit Lot #:

Chip Comments:

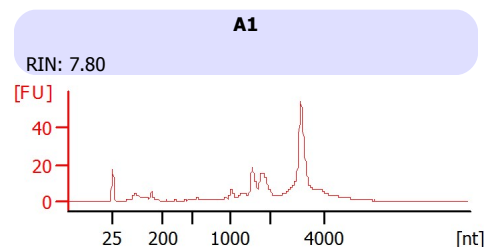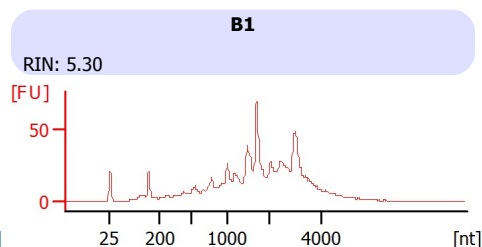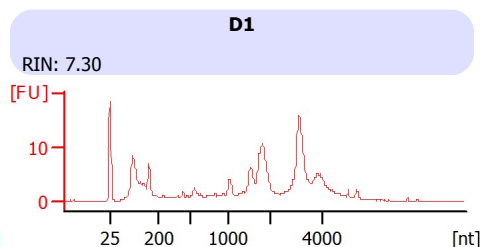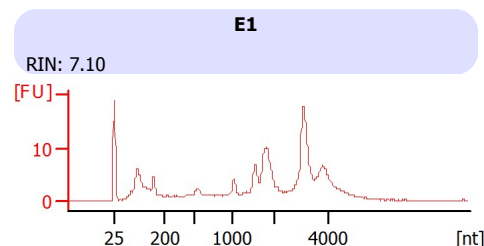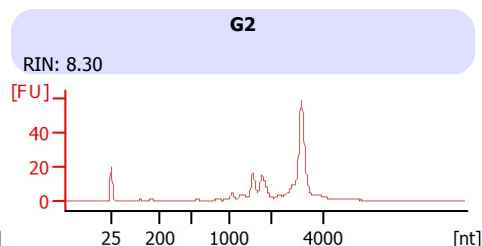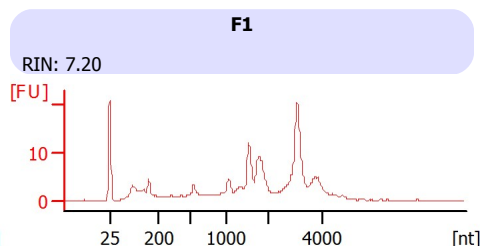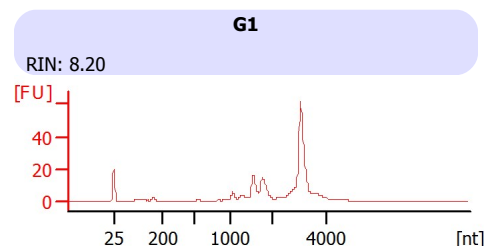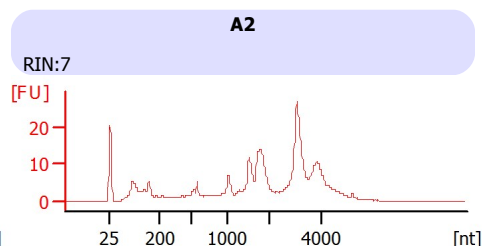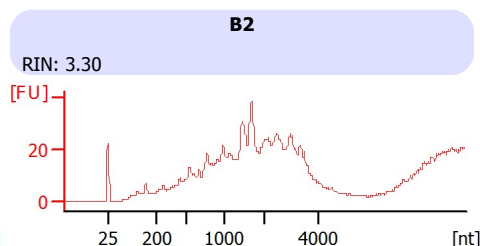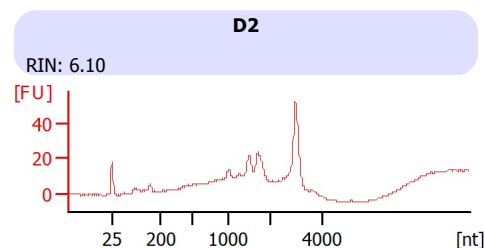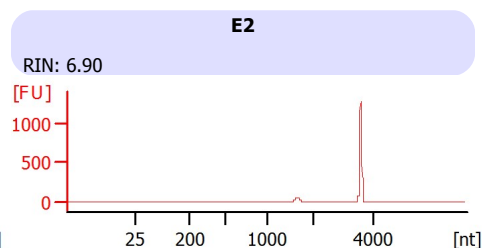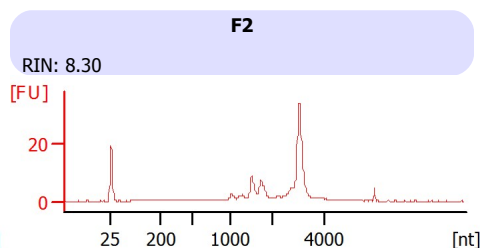

Assay Class: Eukaryote Total RNA Nano  
Data Path: \\1...Eukaryote Total RNA Nano\_DE23101893\_2015-05-06\_09-36-22.xad

Created: 5/6/2015 9:36:22 AM  
Modified: 5/6/2015 3:58:01 PM

**Electrophoresis File Run Summary (Chip Summary)**

| Sample Name | Sample Comment | Status | Result Label      | Result Color |
|-------------|----------------|--------|-------------------|--------------|
| A1          |                | ✓      | RIN: 7.80         |              |
| B1          |                | ✓      | RIN: 5.30         |              |
| D1          |                | ✓      | RIN: 7.30         |              |
| E1          |                | ✓      | RIN: 7.10         |              |
| G2          |                | ✓      | RIN: 8.30         |              |
| F1          |                | ✓      | RIN: 7.20         |              |
| G1          |                | ✓      | RIN: 8.20         |              |
| A2          |                | ✓      | RIN:7             |              |
| B2          |                | ✓      | RIN: 3.30         |              |
| D2          |                | ✓      | RIN: 6.10         |              |
| E2          |                | ✓      | RIN: 6.90         |              |
| F2          |                | ✓      | RIN: 8.30         |              |
| Ladder      |                | ✓      | All Other Samples |              |

**Chip Lot #****Reagent Kit Lot #****Chip Comments :**

Assay Class: Eukaryote Total RNA Nano  
Data Path: \\1...Eukaryote Total RNA Nano\_DE23101893\_2015-05-06\_09-36-22.xad

Created: 5/6/2015 9:36:22 AM  
Modified: 5/6/2015 3:58:01 PM

### Electropherogram Summary

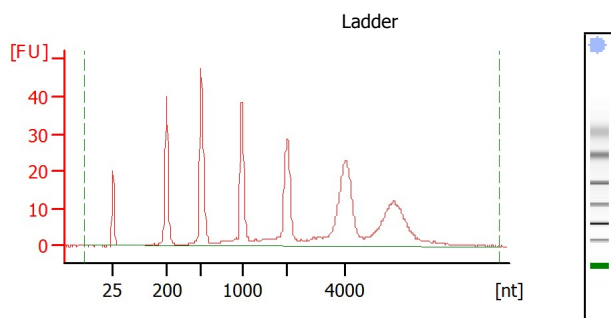

#### Overall Results for Ladder

RNA Area: 472.6  
RNA Concentration: 150 ng/μl  
Result Flagging Color:    
Result Flagging Label: All Other Samples

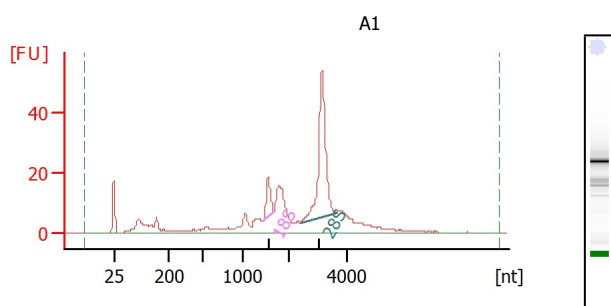

#### Overall Results for sample 1 : A1

RNA Area: 386.8  
RNA Concentration: 123 ng/μl  
rRNA Ratio [28s / 18s]: 5.5  
RNA Integrity Number (RIN): 7.8 (B.02.08, Anomaly Threshold(s) manually adapted)  
Result Flagging Color:    
Result Flagging Label: RIN: 7.80

#### Fragment table for sample 1 : A1

| Name | Start Size [nt] | End Size [nt] | Area | % of total Area |
|------|-----------------|---------------|------|-----------------|
| 18S  | 1,435           | 1,672         | 17.4 | 4.5             |
| 28S  | 2,389           | 3,621         | 96.2 | 24.9            |

Assay Class: Eukaryote Total RNA Nano  
Data Path: \\1...Eukaryote Total RNA Nano\_DE23101893\_2015-05-06\_09-36-22.xad

Created: 5/6/2015 9:36:22 AM  
Modified: 5/6/2015 3:58:01 PM

**Electropherogram Summary Continued ...**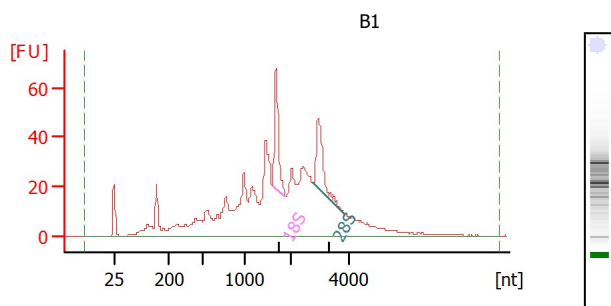**Overall Results for sample 2 : B1**

RNA Area: 977.5  
RNA Concentration: 310 ng/μl  
rRNA Ratio [28s / 18s]: 0.9  
RNA Integrity Number (RIN): 5.3 (B.02.08)  
Result Flagging Color:    
Result Flagging Label: RIN: 5.30

**Fragment table for sample 2 : B1**

| Name | Start Size [nt] | End Size [nt] | Area | % of total Area |
|------|-----------------|---------------|------|-----------------|
| 18S  | 1,610           | 1,902         | 59.5 | 6.1             |
| 28S  | 2,790           | 3,847         | 55.9 | 5.7             |

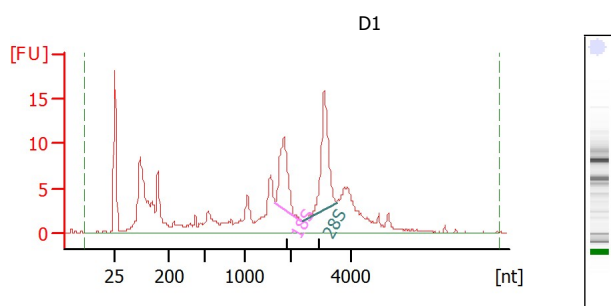**Overall Results for sample 3 : D1**

RNA Area: 228.8  
RNA Concentration: 73 ng/μl  
rRNA Ratio [28s / 18s]: 1.4  
RNA Integrity Number (RIN): 7.3 (B.02.08)  
Result Flagging Color:    
Result Flagging Label: RIN: 7.30

**Fragment table for sample 3 : D1**

| Name | Start Size [nt] | End Size [nt] | Area | % of total Area |
|------|-----------------|---------------|------|-----------------|
| 18S  | 1,650           | 2,305         | 20.2 | 8.8             |
| 28S  | 2,390           | 3,543         | 27.8 | 12.2            |

Assay Class: Eukaryote Total RNA Nano  
Data Path: \\1...Eukaryote Total RNA Nano\_DE23101893\_2015-05-06\_09-36-22.xad

Created: 5/6/2015 9:36:22 AM  
Modified: 5/6/2015 3:58:01 PM

**Electropherogram Summary Continued ...**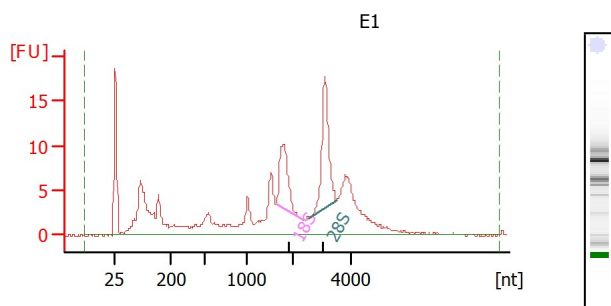**Overall Results for sample 4 : E1**

RNA Area: 225.2  
RNA Concentration: 71 ng/μl  
rRNA Ratio [28s / 18s]: 1.5  
RNA Integrity Number (RIN): 7.1 (B.02.08)  
Result Flagging Color:    
Result Flagging Label: RIN: 7.10

**Fragment table for sample 4 : E1**

| Name | Start Size [nt] | End Size [nt] | Area | % of total Area |
|------|-----------------|---------------|------|-----------------|
| 18S  | 1,651           | 2,263         | 19.6 | 8.7             |
| 28S  | 2,590           | 3,484         | 29.8 | 13.2            |

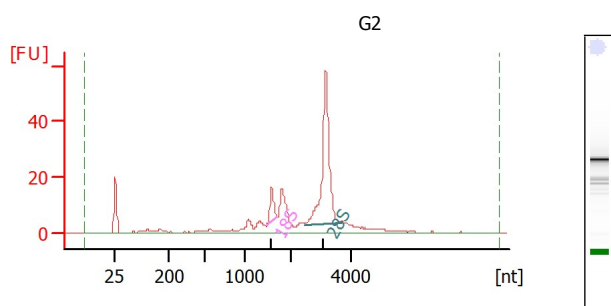**Overall Results for sample 5 : G2**

RNA Area: 298.4  
RNA Concentration: 95 ng/μl  
rRNA Ratio [28s / 18s]: 6.9  
RNA Integrity Number (RIN): 8.3 (B.02.08, Anomaly Threshold(s) manually adapted)  
Result Flagging Color:    
Result Flagging Label: RIN: 8.30

**Fragment table for sample 5 : G2**

| Name | Start Size [nt] | End Size [nt] | Area  | % of total Area |
|------|-----------------|---------------|-------|-----------------|
| 18S  | 1,459           | 1,695         | 15.8  | 5.3             |
| 28S  | 2,447           | 3,643         | 108.3 | 36.3            |

Assay Class: Eukaryote Total RNA Nano  
 Data Path: \\1...Eukaryote Total RNA Nano\_DE23101893\_2015-05-06\_09-36-22.xad

Created: 5/6/2015 9:36:22 AM  
 Modified: 5/6/2015 3:58:01 PM

### Electropherogram Summary Continued ...

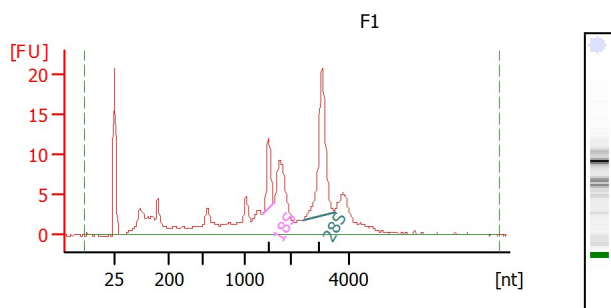

#### Overall Results for sample 6 : F1

RNA Area: 222.5  
 RNA Concentration: 71 ng/μl  
 rRNA Ratio [28s / 18s]: 3.2  
 RNA Integrity Number (RIN): 7.2 (B.02.08)  
 Result Flagging Color:    
 Result Flagging Label: RIN: 7.20

#### Fragment table for sample 6 : F1

| Name | Start Size [nt] | End Size [nt] | Area | % of total Area |
|------|-----------------|---------------|------|-----------------|
| 18S  | 1,393           | 1,639         | 11.7 | 5.3             |
| 28S  | 2,418           | 3,488         | 37.0 | 16.6            |

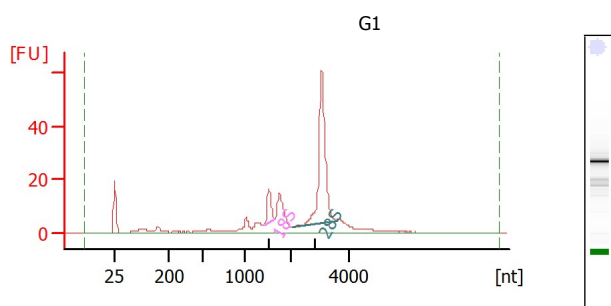

#### Overall Results for sample 7 : G1

RNA Area: 303.4  
 RNA Concentration: 96 ng/μl  
 rRNA Ratio [28s / 18s]: 6.3  
 RNA Integrity Number (RIN): 8.2 (B.02.08, Anomaly Threshold(s) manually adapted)  
 Result Flagging Color:    
 Result Flagging Label: RIN: 8.20

#### Fragment table for sample 7 : G1

| Name | Start Size [nt] | End Size [nt] | Area  | % of total Area |
|------|-----------------|---------------|-------|-----------------|
| 18S  | 1,430           | 1,657         | 16.4  | 5.4             |
| 28S  | 2,076           | 3,545         | 103.7 | 34.2            |

Assay Class: Eukaryote Total RNA Nano  
 Data Path: \\1...Eukaryote Total RNA Nano\_DE23101893\_2015-05-06\_09-36-22.xad

Created: 5/6/2015 9:36:22 AM  
 Modified: 5/6/2015 3:58:01 PM

### Electropherogram Summary Continued ...

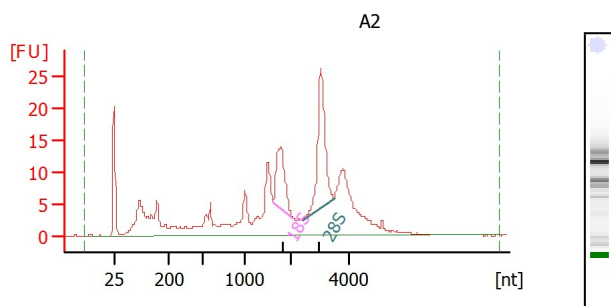

#### Overall Results for sample 8 : A2

RNA Area: 329.9  
 RNA Concentration: 105 ng/μl  
 rRNA Ratio [28s / 18s]: 1.7  
 RNA Integrity Number (RIN): 7 (B.02.08)  
 Result Flagging Color:    
 Result Flagging Label: RIN:7

#### Fragment table for sample 8 : A2

| Name | Start Size [nt] | End Size [nt] | Area | % of total Area |
|------|-----------------|---------------|------|-----------------|
| 18S  | 1,637           | 2,103         | 25.9 | 7.8             |
| 28S  | 2,432           | 3,504         | 44.7 | 13.5            |

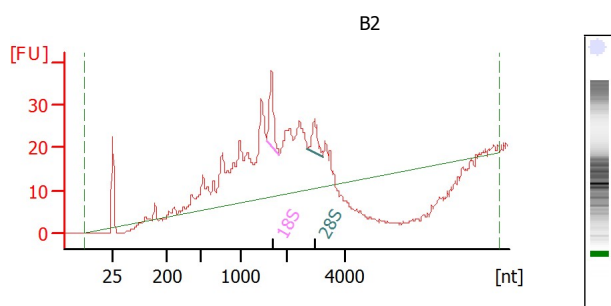

#### Overall Results for sample 9 : B2

RNA Area: 465.1  
 RNA Concentration: 148 ng/μl  
 rRNA Ratio [28s / 18s]: 0.5  
 RNA Integrity Number (RIN): 3.3 (B.02.08, Anomaly Threshold(s) manually adapted)  
 Result Flagging Color:    
 Result Flagging Label: RIN: 3.30

#### Fragment table for sample 9 : B2

| Name | Start Size [nt] | End Size [nt] | Area | % of total Area |
|------|-----------------|---------------|------|-----------------|
| 18S  | 1,567           | 1,842         | 24.0 | 5.2             |
| 28S  | 2,705           | 3,238         | 11.8 | 2.5             |

Assay Class: Eukaryote Total RNA Nano  
 Data Path: \\1...Eukaryote Total RNA Nano\_DE23101893\_2015-05-06\_09-36-22.xad

Created: 5/6/2015 9:36:22 AM  
 Modified: 5/6/2015 3:58:01 PM

### Electropherogram Summary Continued ...

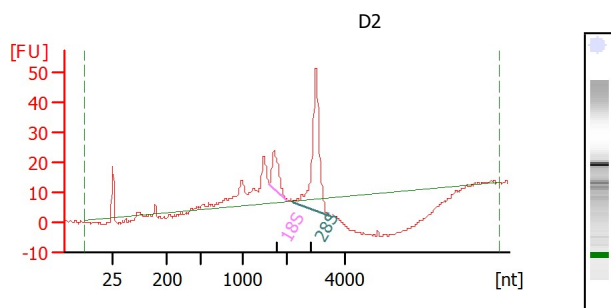

#### Overall Results for sample 10 : D2

RNA Area: 229.3  
 RNA Concentration: 73 ng/μl  
 rRNA Ratio [28s / 18s]: 3.8  
 RNA Integrity Number (RIN): 6.1 (B.02.08, Anomaly Threshold(s) manually adapted)  
 Result Flagging Color:    
 Result Flagging Label: RIN: 6.10

#### Fragment table for sample 10 : D2

| Name | Start Size [nt] | End Size [nt] | Area  | % of total Area |
|------|-----------------|---------------|-------|-----------------|
| 18S  | 1,605           | 1,972         | 26.6  | 11.6            |
| 28S  | 2,172           | 3,496         | 101.2 | 44.1            |

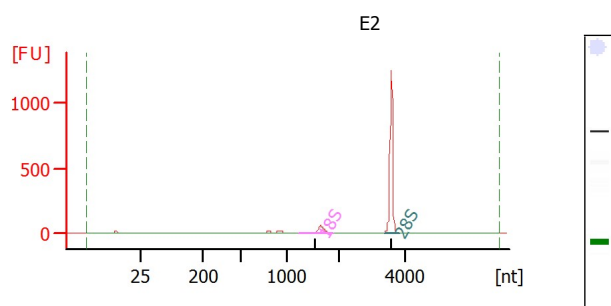

#### Overall Results for sample 11 : E2

RNA Area: 1,075.9  
 RNA Concentration: 341 ng/μl  
 rRNA Ratio [28s / 18s]: 7.8  
 RNA Integrity Number (RIN): 6.9 (B.02.08, Anomaly Threshold(s) manually adapted)  
 Result Flagging Color:    
 Result Flagging Label: RIN: 6.90

#### Fragment table for sample 11 : E2

| Name | Start Size [nt] | End Size [nt] | Area  | % of total Area |
|------|-----------------|---------------|-------|-----------------|
| 18S  | 1,202           | 1,878         | 99.6  | 9.3             |
| 28S  | 3,349           | 3,791         | 775.6 | 72.1            |



Assay Class: Eukaryote Total RNA Nano  
Data Path: \\1...Eukaryote Total RNA Nano\_DE23101893\_2015-05-06\_09-36-22.xad

Created: 5/6/2015 9:36:22 AM  
Modified: 5/6/2015 3:58:01 PM

**Electropherogram Summary Continued ...**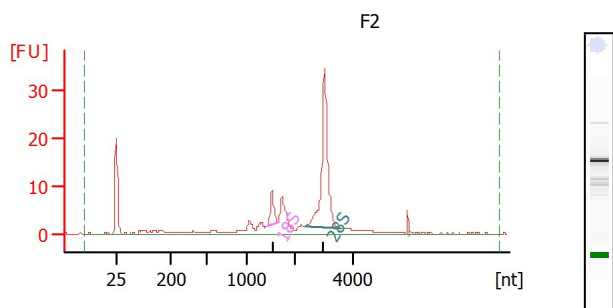**Overall Results for sample 12 : F2**

RNA Area: 154.3  
RNA Concentration: 49 ng/μl  
rRNA Ratio [28s / 18s]: 6.7  
RNA Integrity Number (RIN): 8.3 (B.02.08, Anomaly Threshold(s) manually adapted)  
Result Flagging Color:    
Result Flagging Label: RIN: 8.30

**Fragment table for sample 12 : F2**

| Name | Start Size [nt] | End Size [nt] | Area | % of total Area |
|------|-----------------|---------------|------|-----------------|
| 18S  | 1,438           | 1,654         | 8.6  | 5.6             |
| 28S  | 2,392           | 3,580         | 57.7 | 37.4            |
