# Supplementary material for: Gene Expression Analysis of Induced Plum pox virus (Sharka) Resistance in Peach (Prunus persica) by Almond (P. dulcis) Grafting
Source: MDPI journal article supplement (doi:10.3390/ijms22073585), 2021-03-30
Supplement: s1 [file s1]

**Prupe.5G193400**

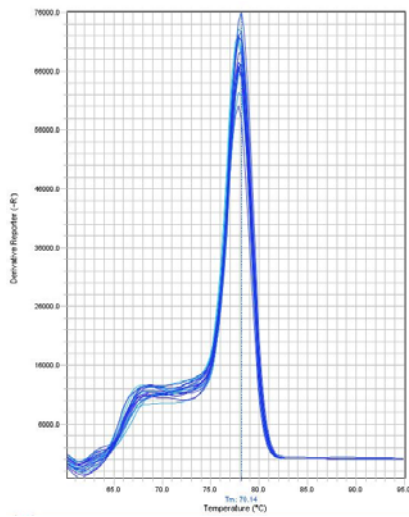

**Prupe.1G453700**

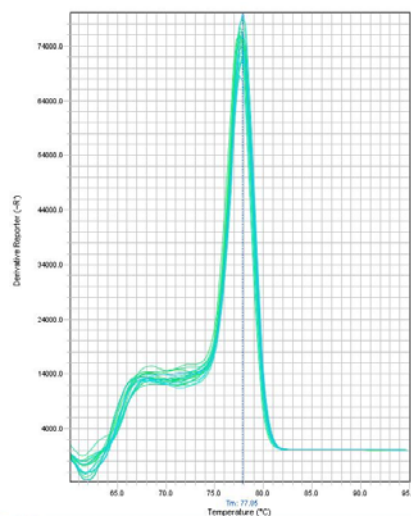

**Prupe.7G194400**

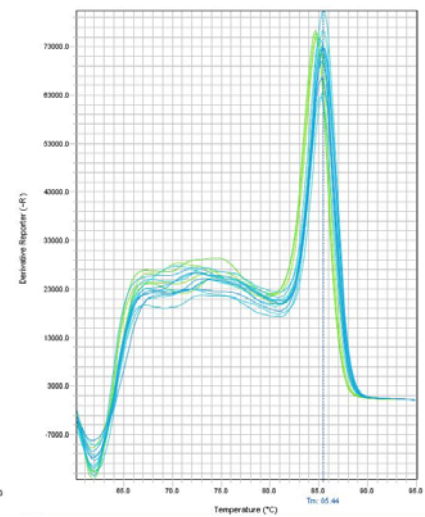

**Prupe.4G176200**

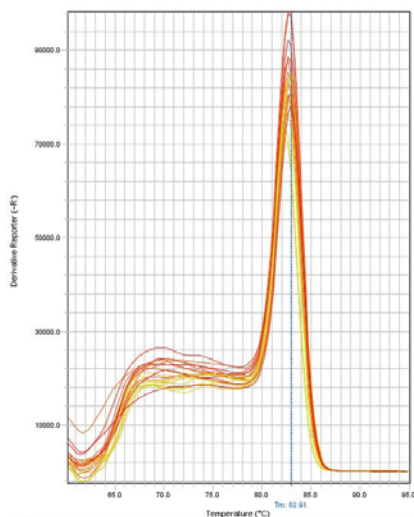

**Prupe.1G393400**

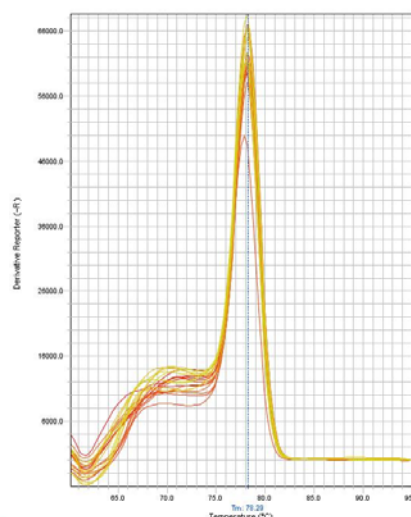

**Prupe.5G164200**

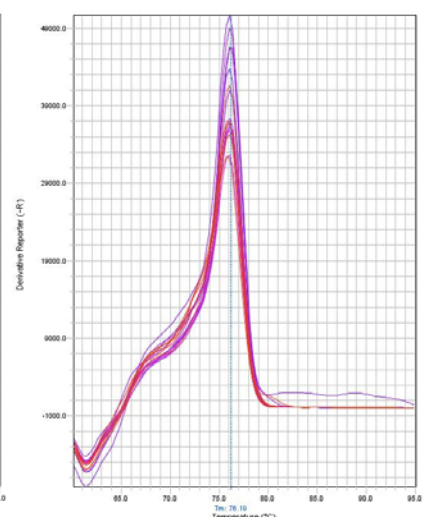

**Melting temperatures for candidate genes involved in phytohormonal signalling.**

Prupe.5G193400; *Gibberellin-regulated protein 4*

Prupe.1G453700; *Dehydration-responsive protein RD22*

Prupe.7G194400; *Ethylene-responsive transcription factor ERF017*

Prupe.4G176200; *Ethylene responsive element binding protein (ERBP)-like factor*

Prupe.1G393400; *Chrorismate mutase*

Prupe.5G164200; *Cytochrome P450 71A1 (CYP71A1)*

**Prupe.8G163300**

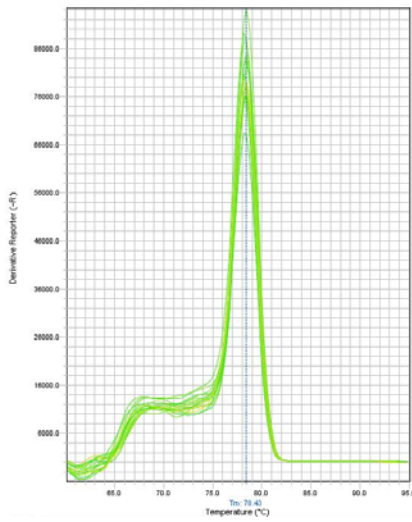

**Prupe.1G039900**

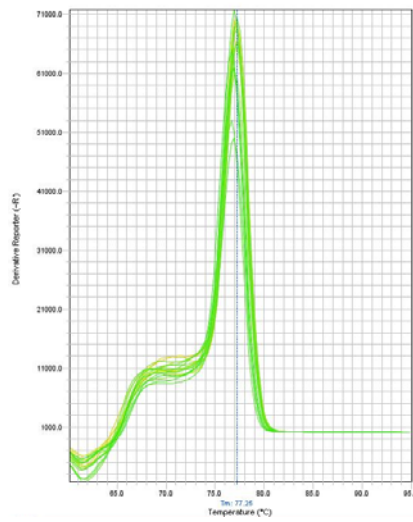

**Prupe.1G091400**

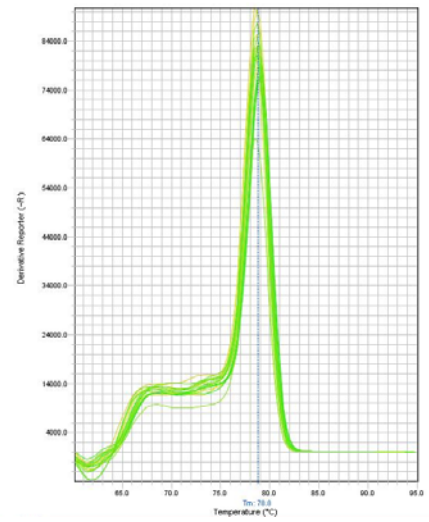

**Prupe.2G204700**

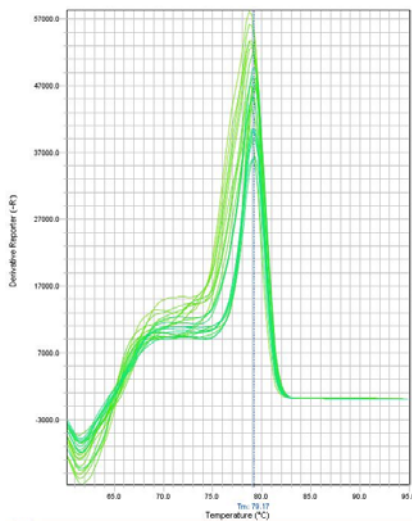

**Prupe.3G255800**

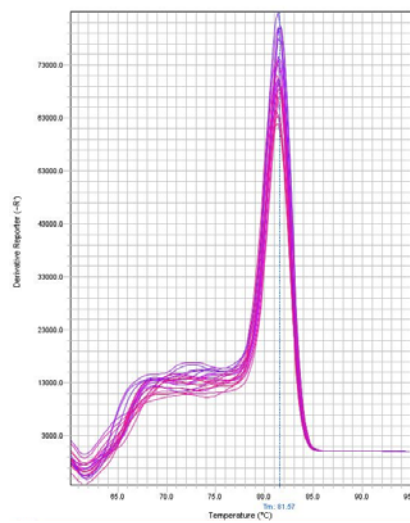

**Prupe.7G051200**

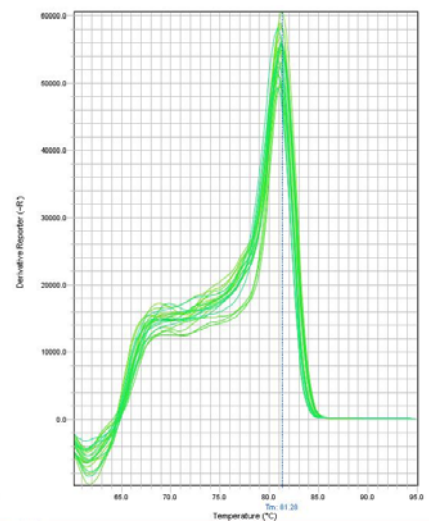

**Prupe.7G048000**

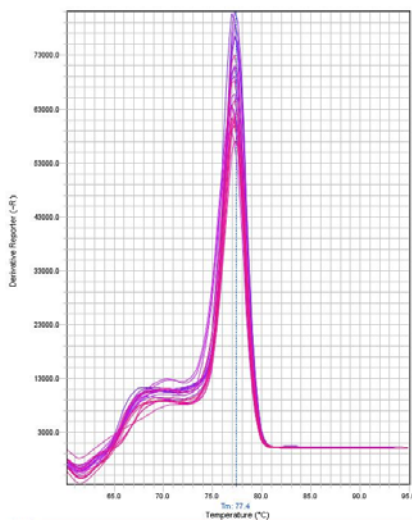

**Prupe.1G488200**

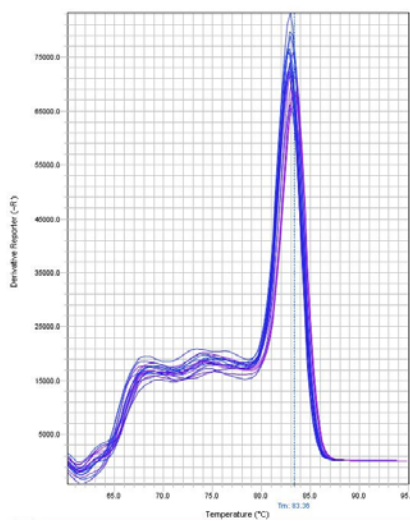

### **Melting temperatures for candidate genes related to pathogen response**

Prupe.8G163300; *Pathogenesis-related thaumatin-like protein*

Prupe.1G039900; *Glutathione S-Transferase*

Prupe.1G091400; *Pathogenesis-related 1 protein*

Prupe.2G204700; *No apical meristem protein*

Prupe.3G255800; *Transcription initiation factor TFIIB*

Prupe.7G051200; *Glucan endo-1,3-beta-D-glucosidase*

Prupe.7G048000; *Endoribonuclease DICER homolog 2 (DCL2)*

Prupe.1G488200; *Speckle-type POZ protein*

**Prupe.2G263600**

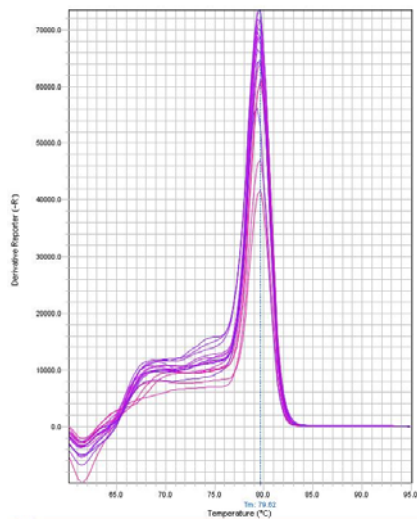

**Prupe.8G132000**

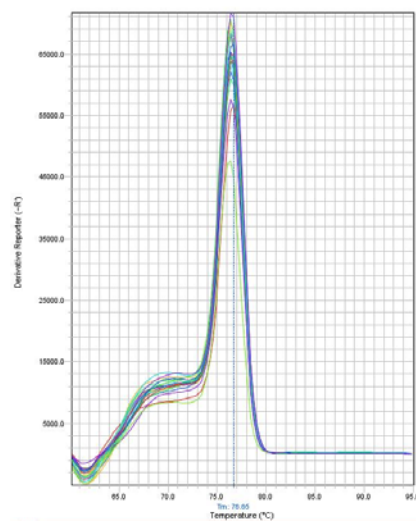

**Prupe.6G163400**

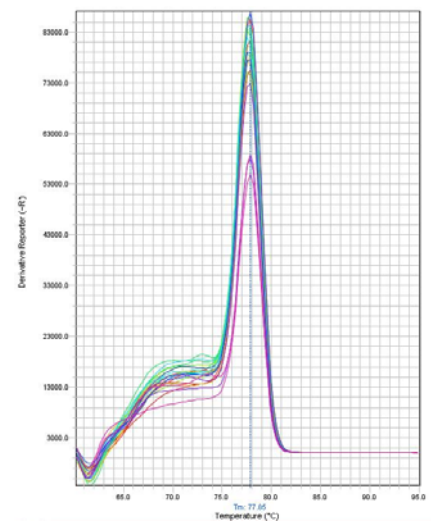

**Melting temperatures for reference genes assayed**

Prupe.2G263600; *Expansine-A8*

Prupe.8G132000; *RNA polymerase II*

Prupe.6G163400; *Actin*
